# Supplementary material
Source: PubMed Central journal article supplement (PMC11072440)
Supplement: 18_2023_5010_MOESM2_ESM.pdf [file 18_2023_5010_MOESM2_ESM.pdf]

## Increasing HbA1c is associated with reduced CD8<sup>+</sup> T cell functionality in response to influenza virus in a TCR-dependent manner in individuals with diabetes mellitus

Katina D. Hulme<sup>1,2</sup>, Zhen Wei Marcus Tong<sup>1</sup>, Louise C. Rowntree<sup>3</sup>, Carolien E. van de Sandt<sup>3,4</sup>, Katharina Ronacher<sup>5,6</sup>, Emma J. Grant<sup>7,8</sup>, Emily S. Dorey<sup>9</sup>, Linda A. Gallo<sup>10,11</sup>, Stephanie Gras<sup>7,8</sup>, Katherine Kedzierska<sup>3</sup>, Helen L. Barrett<sup>9,12,13</sup> & Kirsty R. Short<sup>1,6</sup>

### Supplementary Material

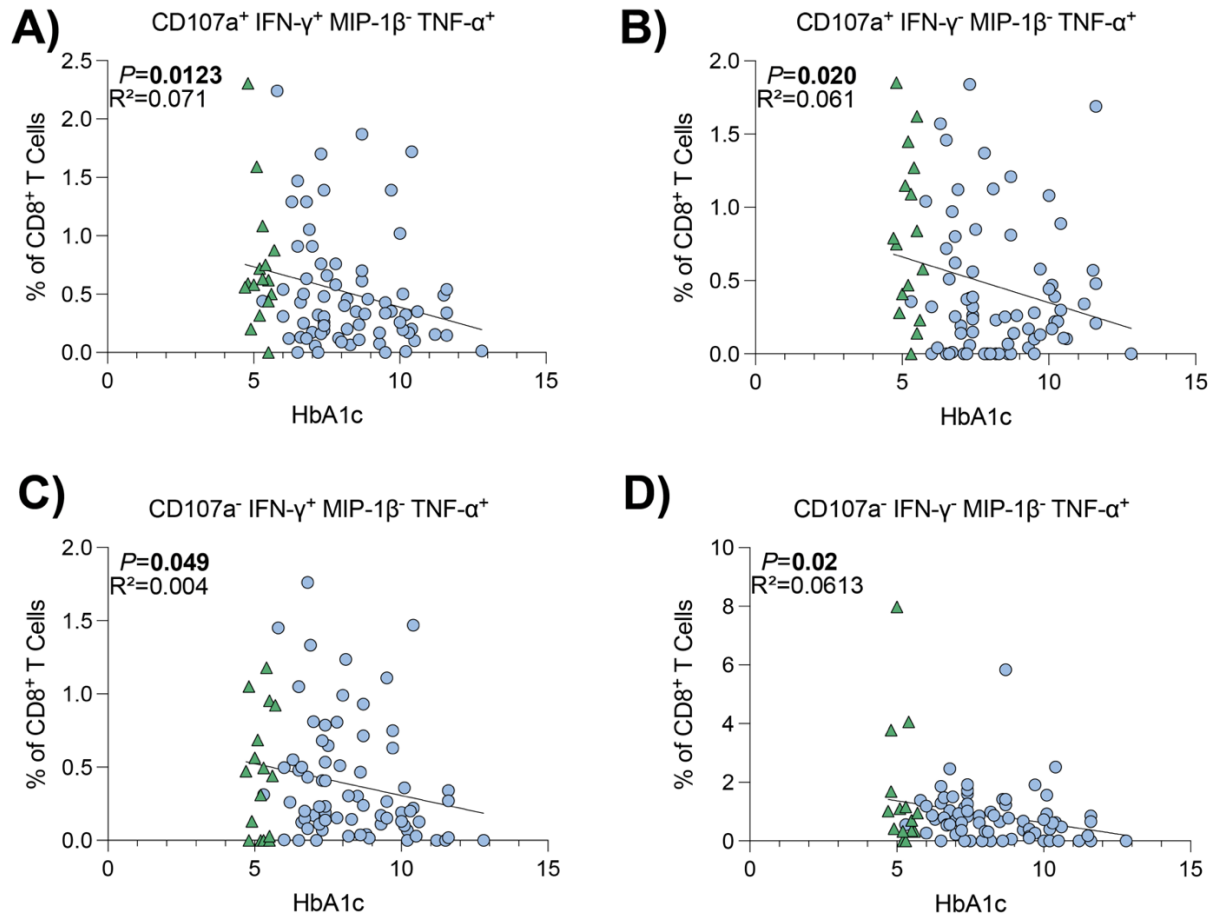

### Supplementary Figure 1: TNF- $\alpha$ expression was affected in multiple polyfunctional CD8<sup>+</sup> T cell populations.

CD8<sup>+</sup> T cells were stimulated for 18 hours using anti-CD3/anti-CD28 coated beads. Results are presented as the frequency of CD8<sup>+</sup> T cells expressing the select markers, with background staining subtracted. Data points represent individual donors (n=88). Statistical significance was determined using simple linear regression, with significant P values displayed. **A-D)** Donors without diabetes are represented by green triangles. Donors with diabetes are represented by blue circles.

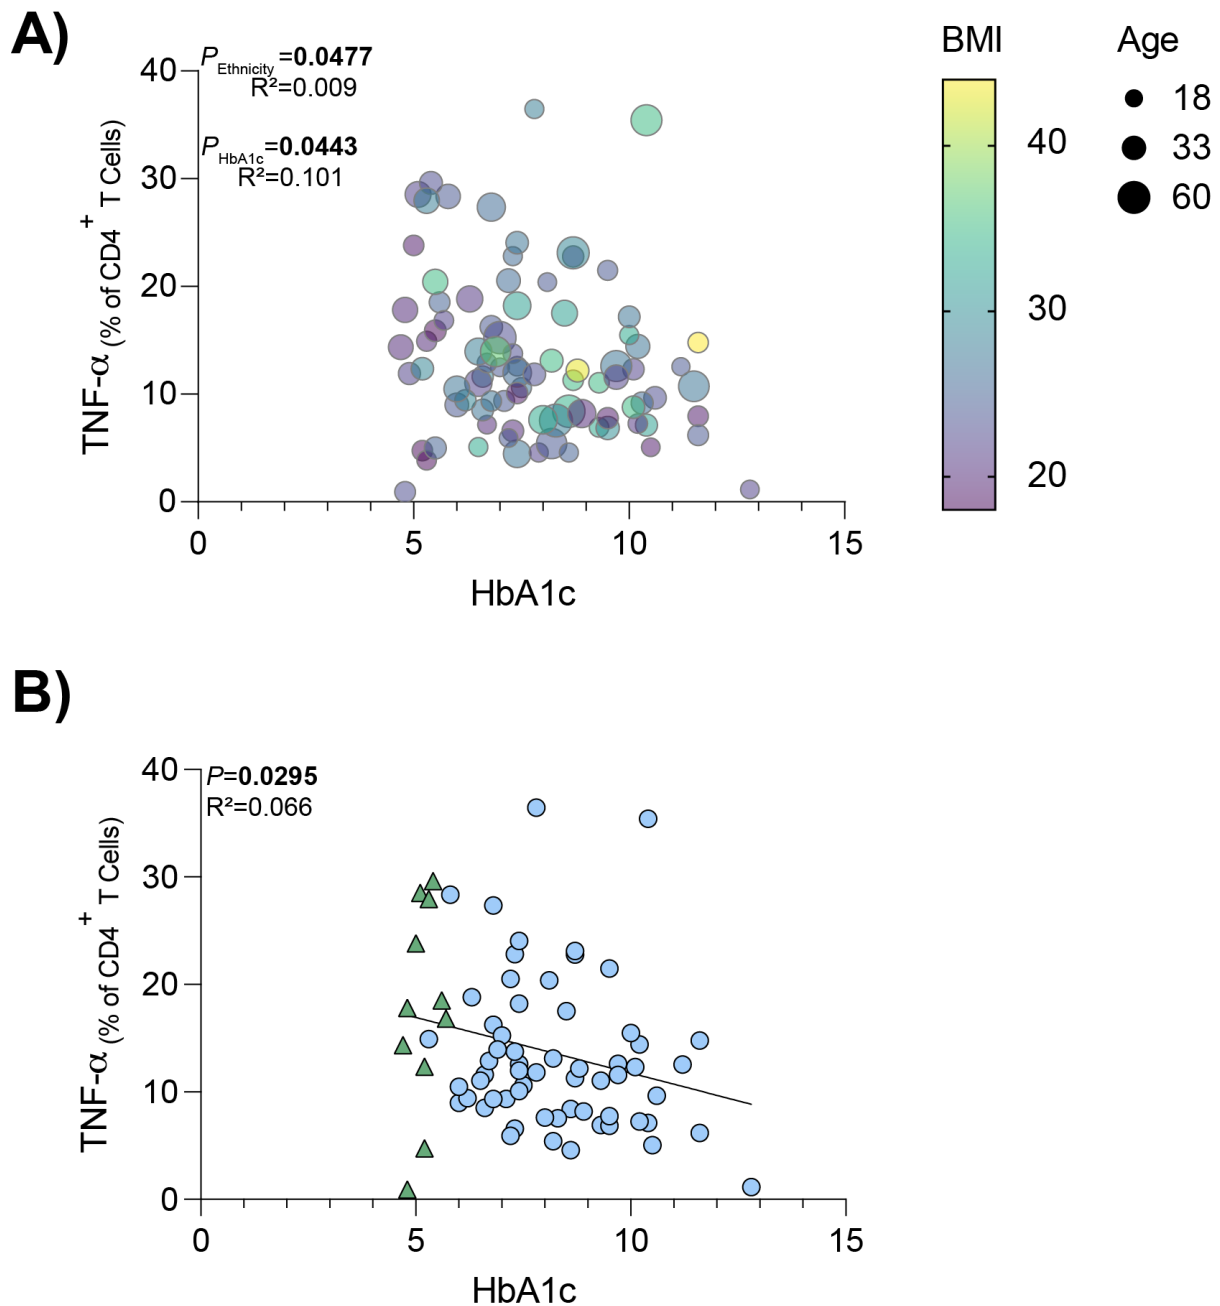

**Supplementary Figure 2: Reduced TNF- $\alpha$  expression associated with increasing HbA1c was also observed in CD4<sup>+</sup> T cells.**

CD4<sup>+</sup> T cells were stimulated for 18 hours using anti-CD3/anti-CD28 coated beads. Results are presented as the frequency of CD8<sup>+</sup> T cells expressing TNF- $\alpha$ , with background staining subtracted. **A)** Data points represent individual donors (n=88). Statistical significance was determined using multiple variable regression analysis, where input variables were age, sex, BMI, HbA1c and ethnicity, with significant *P* values displayed. **B)** Relationship between HbA1c and TNF- $\alpha$  produced by CD4<sup>+</sup> T cells in Caucasian donors. Each data point represents an individual donor (n=73). Statistical significance was determined using simple linear regression. Donors without diabetes are represented by green triangles. Donors with diabetes are represented by blue circles.
